# Supplementary material for: ADAM22 ethnic-specific variant reducing binding of membrane-associated guanylate kinases causes focal epilepsy and behavioural disorder
Source: PubMed Central journal article supplement (PMC10636567; doi:10.1093/braincomms/fcad295), 2023-10-27

**Related to Fig. 2A**

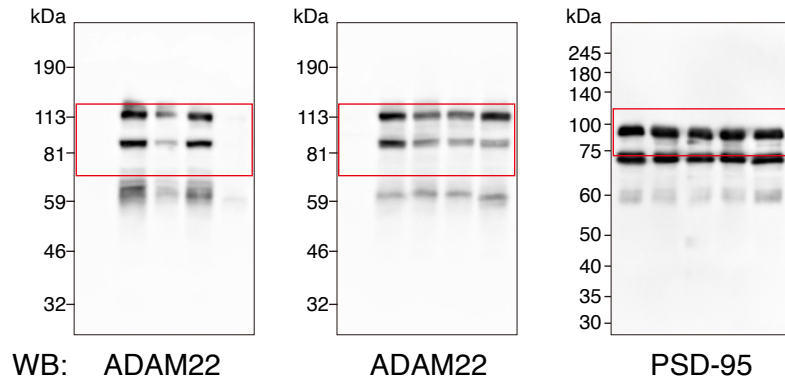

**Related to Fig. 2C**

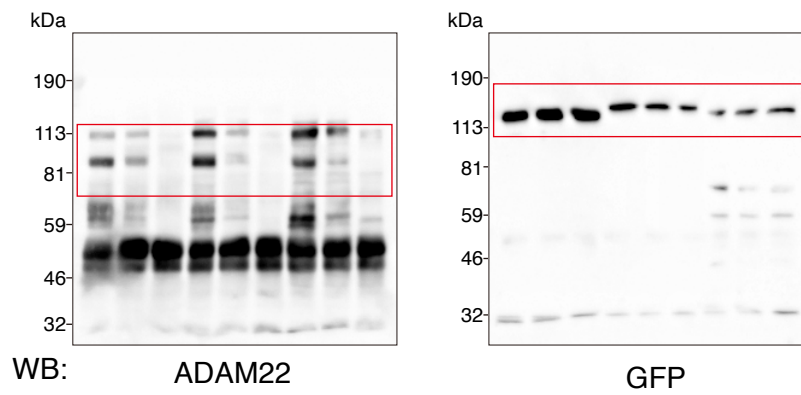

**Related to Fig. 2D**

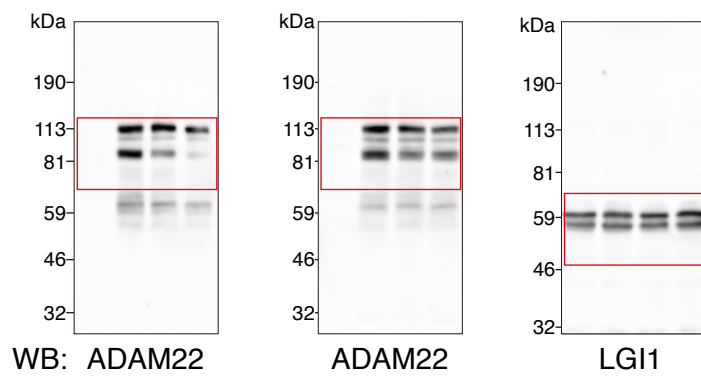

Supplement: fcad295_supplementary_data.pdf [file fcad295_supplementary_data.pdf]
